# Supplementary material
Source: HighWire-hosted journal article supplement (https://www.annfammed.org/highwire/filestream/7809/field_highwire_adjunct_files/0/Player_App.pdf)
Supplement: Player_App.pdf [file Player_App.pdf]

**Online Supplementary Material**

Player MS, King DE, Mainous AG III, Geesey ME. Psychosocial factors and progression from prehypertension to hypertension or coronary heart disease. *Ann Fam Med.* 2007;5(5):403-411.

<http://www.annfammed.org/cgi/content/full/5/5/403/DC1>

**Supplemental Table 1. Multivariable Logistic and Cox Regression Analysis for Development of Hypertension or CHD/CHD Death With Continuous Covariates**

| <b>Psychosocial Variable</b>                                                                                                                                               | <b>Progression to Hypertension*<br/>AOR (95% CI)</b> | <b>Progression to CHD/CHD Death†<br/>AOR (95% CI)</b> |
|----------------------------------------------------------------------------------------------------------------------------------------------------------------------------|------------------------------------------------------|-------------------------------------------------------|
| Maastricht Questionnaire score (long-term stress)                                                                                                                          |                                                      |                                                       |
| Low/moderate                                                                                                                                                               | 1.00                                                 | 1.00                                                  |
| High                                                                                                                                                                       | 1.10 (0.91-1.34)                                     | 1.79 (1.28-2.49)                                      |
| Spielberger Trait Anger Scale score                                                                                                                                        |                                                      |                                                       |
| Low/moderate                                                                                                                                                               | 1.00                                                 | 1.00                                                  |
| High                                                                                                                                                                       | 1.54 (1.06-2.25)                                     | 1.99 (1.19-3.32)                                      |
| CHD = coronary heart disease; AOR = adjusted odds ratio; CI = confidence interval.                                                                                         |                                                      |                                                       |
| * Adjusted for age (continuous), sex, race, body mass index, diabetes mellitus, low-density lipoprotein cholesterol (continuous), hours of exercise per week (continuous). |                                                      |                                                       |
| † Adjusted for age (continuous), sex, race, current smoking status, history of diabetes, low-density lipoprotein cholesterol (continuous).                                 |                                                      |                                                       |
